# Supplementary material for: Effect of Probiotics on Glycemic Control: A Systematic Review and Meta-Analysis of Randomized, Controlled Trials
Source: PubMed Central journal article supplement (PMC4498615; doi:10.1371/journal.pone.0132121), 2015-07-10
Supplement: pone.0132121.s001.pdf [file pone.0132121.s001.pdf]

|                    | Random sequence generation (selection bias) | Allocation concealment (selection bias) | Blinding of participants and personnel (performance bias) | Blinding of outcome assessment (detection bias) | Incomplete outcome data (attrition bias) | Selective reporting (reporting bias) | Other bias |
|--------------------|---------------------------------------------|-----------------------------------------|-----------------------------------------------------------|-------------------------------------------------|------------------------------------------|--------------------------------------|------------|
| Asemi, 2013        | +                                           | ?                                       | +                                                         | +                                               | +                                        | +                                    | +          |
| Asemi, 2013        | +                                           | -                                       | -                                                         | +                                               | +                                        | +                                    | -          |
| Bukowska, 1998     | +                                           | ?                                       | ?                                                         | ?                                               | +                                        | +                                    | -          |
| Ejtahed, 2012      | +                                           | +                                       | +                                                         | +                                               | +                                        | +                                    | -          |
| Ivey, 2014, A      | +                                           | +                                       | +                                                         | +                                               | +                                        | +                                    | +          |
| Ivey, 2014, B      | +                                           | +                                       | +                                                         | +                                               | +                                        | +                                    | +          |
| Jones, 2012        | +                                           | +                                       | +                                                         | +                                               | +                                        | +                                    | +          |
| Jung, 2013         | +                                           | ?                                       | ?                                                         | +                                               | ?                                        | +                                    | ?          |
| Laitinen, 2009     | +                                           | +                                       | +                                                         | +                                               | +                                        | +                                    | +          |
| Lindsay, 2014      | +                                           | +                                       | +                                                         | +                                               | +                                        | +                                    | -          |
| Mohamadshahi, 2014 | +                                           | ?                                       | +                                                         | +                                               | +                                        | +                                    | -          |
| Naruszewicz, 2002  | +                                           | ?                                       | ?                                                         | +                                               | +                                        | +                                    | +          |
| Rajkumar, 2014     | +                                           | +                                       | +                                                         | +                                               | +                                        | +                                    | +          |
| Rajkumar, 2014     | +                                           | ?                                       | +                                                         | +                                               | +                                        | +                                    | -          |
| Shakeri, 2014      | +                                           | ?                                       | +                                                         | +                                               | +                                        | +                                    | +          |
| Sharafedinov, 2013 | +                                           | +                                       | +                                                         | +                                               | ?                                        | +                                    | -          |
| Shavakhi, 2013     | +                                           | ?                                       | +                                                         | +                                               | +                                        | +                                    | +          |
